# Supplementary material for: Health benefits package selection in oncology: a clinical audit of palliative chemotherapy for breast cancer in an Indian health insurance scheme
Source: PubMed Central journal article supplement (PMC11654404; doi:10.1186/s12913-024-12018-4), 2024-12-18
Supplement: 12913_2024_12018_MOESM1_ESM.pdf [file 12913_2024_12018_MOESM1_ESM.pdf]

Supplemental Material

Figure A1. Distribution of claims based on claims history

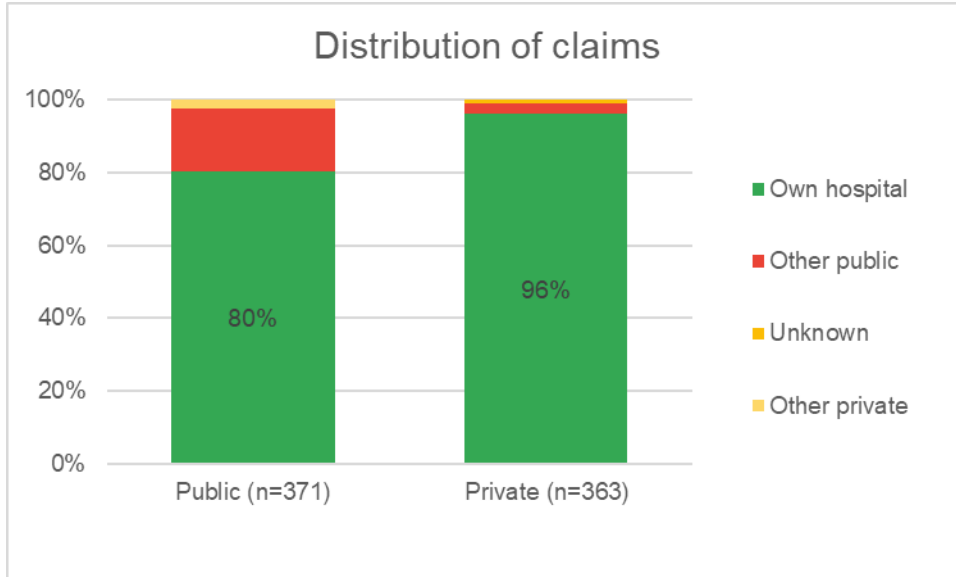

Note: based on claims history between March 19, 2014 and March 15, 2021.

Figure A2. Number of hospitals per patient based on claims history

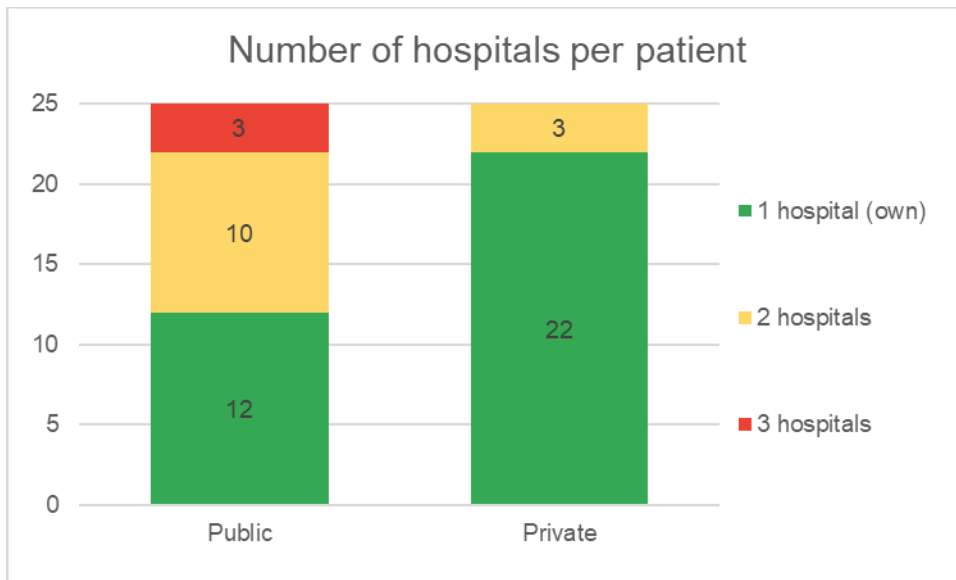

Note: based on claims history between March 19, 2014 and March 15, 2021.

**Table A1: Drugs for metastatic breast cancer per NCG guidelines**

| ER + PR + Her 2                                                                                                        |                                                                        | HER 2 positive                                       | TNBC                                                                                               |
|------------------------------------------------------------------------------------------------------------------------|------------------------------------------------------------------------|------------------------------------------------------|----------------------------------------------------------------------------------------------------|
| <b>First Line Therapy</b>                                                                                              |                                                                        |                                                      |                                                                                                    |
| <u>Low tumor burden:</u><br>Letrozole/ Anastrozole/ Exemestane<br>/ Tamoxifen<br><u>Plus Ribociclib or Palbociclib</u> | <u>Visceral crisis:</u><br>Taxane                                      | Taxane plus Trastuzumab                              | Taxane                                                                                             |
|                                                                                                                        | Adriamycin Cyclophosphamide (AC) /<br>Epirubicin Cyclophosphamide (EC) |                                                      | Adriamycin Cyclophosphamide (AC) /<br>Epirubicin Cyclophosphamide (EC)<br><br>Taxane plus platinum |
| <b>Second Line Therapy</b>                                                                                             |                                                                        |                                                      |                                                                                                    |
| Fulvestrant or Everolimus and<br>Exemestane                                                                            | Capecitabine                                                           | Lapatinib plus Capecitabine                          | Capecitabine                                                                                       |
| <u>Also in PIK 3 CA mutant - Alpelisib<br/>plus Fulvestrant</u>                                                        | Gemcitabine Carboplatin                                                | TDM1                                                 | Gemcitabine platinum                                                                               |
| If premenopausal then Ovarian<br>suppression - Avoid Tamoxifen with<br>Ribociclib                                      |                                                                        | Hormone therapy as maintenance of<br>ER/ PR positive | Eribulin                                                                                           |
|                                                                                                                        |                                                                        | -                                                    | Olaparib or Rucaparib for any patient<br>with Germline or somatic mutation                         |
